# Supplementary material
Source: publisher site journal article supplement (https://www.dovepress.com/article/464546)
Supplement: Supplementary file 1 [file get_supplementary_file.php]

**Supplementary Materials**

Supplementary Table S1: PRISMA 2020 Checklist.Supplementary Table S2: Search strategy.Supplementary Table S3: Exclude systematic reviews.

Supplementary Table S4: Reporting quality assessment of systematic reviews by PRISMA-A.

Supplementary Table S5: Evidence certainty assessments of outcomes of included systematic reviews by GRADE.

Supplementary Figure S1-3: Forest plots of FEV1%, FEV1/FVC, FVC.

Supplementary Figure S4: Forest plots of 6MWD.

## Supplementary Table S1: PRISMA 2020 Checklist.

| **Section and Topic** | **Item #** | **Checklist item** | **Location where item is reported** |
| --- | --- | --- | --- |
| **TITLE** | | |  |
| Title | 1 | Identify the report as a systematic review. | 1 |
| **ABSTRACT** | | |  |
| Abstract | 2 | See the PRISMA 2020 for Abstracts checklist. | 1-2 |
| **INTRODUCTION** | | |  |
| Rationale | 3 | Describe the rationale for the review in the context of existing knowledge. | 2-3 |
| Objectives | 4 | Provide an explicit statement of the objective(s) or question(s) the review addresses. | 3 |
| **METHODS** | | |  |
| Eligibility criteria | 5 | Specify the inclusion and exclusion criteria for the review and how studies were grouped for the syntheses. | 4-5 |
| Information sources | 6 | Specify all databases, registers, websites, organisations, reference lists and other sources searched or consulted to identify studies. Specify the date when each source was last searched or consulted. | 4 |
| Search strategy | 7 | Present the full search strategies for all databases, registers and websites, including any filters and limits used. | 4 and Supplementary Table 2 |
| Selection process | 8 | Specify the methods used to decide whether a study met the inclusion criteria of the review, including how many reviewers screened each record and each report retrieved, whether they worked independently, and if applicable, details of automation tools used in the process. | 5 |
| Data collection process | 9 | Specify the methods used to collect data from reports, including how many reviewers collected data from each report, whether they worked independently, any processes for obtaining or confirming data from study investigators, and if applicable, details of automation tools used in the process. | 5 |
| Data items | 10a | List and define all outcomes for which data were sought. Specify whether all results that were compatible with each outcome domain in each study were sought (e.g. for all measures, time points, analyses), and if not, the methods used to decide which results to collect. | 4 |
| 10b | List and define all other variables for which data were sought (e.g. participant and intervention characteristics, funding sources). Describe any assumptions made about any missing or unclear information. | 5 and Table 1 |
| Study risk of bias assessment | 11 | Specify the methods used to assess risk of bias in the included studies, including details of the tool(s) used, how many reviewers assessed each study and whether they worked independently, and if applicable, details of automation tools used in the process. | 6 |
| Effect measures | 12 | Specify for each outcome the effect measure(s) (e.g. risk ratio, mean difference) used in the synthesis or presentation of results. | 5-7 |
| Synthesis methods | 13a | Describe the processes used to decide which studies were eligible for each synthesis (e.g. tabulating the study intervention characteristics and comparing against the planned groups for each synthesis (item #5)). | 4 |
| 13b | Describe any methods required to prepare the data for presentation or synthesis, such as handling of missing summary statistics, or data conversions. | 5-7 |
| 13c | Describe any methods used to tabulate or visually display results of individual studies and syntheses. | NA |
| 13d | Describe any methods used to synthesize results and provide a rationale for the choice(s). If meta-analysis was performed, describe the model(s), method(s) to identify the presence and extent of statistical heterogeneity, and software package(s) used. | 5-7 |
| 13e | Describe any methods used to explore possible causes of heterogeneity among study results (e.g. subgroup analysis, meta-regression). | NA |
| 13f | Describe any sensitivity analyses conducted to assess robustness of the synthesized results. | NA |
| Reporting bias assessment | 14 | Describe any methods used to assess risk of bias due to missing results in a synthesis (arising from reporting biases). | 6 |
| Certainty assessment | 15 | Describe any methods used to assess certainty (or confidence) in the body of evidence for an outcome. | 6-7 |
| **RESULTS** | | |  |
| Study selection | 16a | Describe the results of the search and selection process, from the number of records identified in the search to the number of studies included in the review, ideally using a flow diagram. | 8 and Figure 1 |
| 16b | Cite studies that might appear to meet the inclusion criteria, but which were excluded, and explain why they were excluded. | Supplementary Table 3 |
| Study characteristics | 17 | Cite each included study and present its characteristics. | 8 and Table 1 |
| Risk of bias in studies | 18 | Present assessments of risk of bias for each included study. | 9 and Table 3 |
| Results of individual studies | 19 | For all outcomes, present, for each study: (a) summary statistics for each group (where appropriate) and (b) an effect estimate and its precision (e.g. confidence/credible interval), ideally using structured tables or plots. | Supplementary Table 5 |
| Results of syntheses | 20a | For each synthesis, briefly summarise the characteristics and risk of bias among contributing studies. | NA |
| 20b | Present results of all statistical syntheses conducted. If meta-analysis was done, present for each the summary estimate and its precision (e.g. confidence/credible interval) and measures of statistical heterogeneity. If comparing groups, describe the direction of the effect. | 10-13 Table 4-8, and Supplementary Table 5 |
| 20c | Present results of all investigations of possible causes of heterogeneity among study results. | NA |
| 20d | Present results of all sensitivity analyses conducted to assess the robustness of the synthesized results. | NA |
| Reporting biases | 21 | Present assessments of risk of bias due to missing results (arising from reporting biases) for each synthesis assessed. | NA |
| Certainty of evidence | 22 | Present assessments of certainty (or confidence) in the body of evidence for each outcome assessed. | 10 and Supplementary Table 5 |
| **DISCUSSION** | | |  |
| Discussion | 23a | Provide a general interpretation of the results in the context of other evidence. | 13-15 |
| 23b | Discuss any limitations of the evidence included in the review. | NA |
| 23c | Discuss any limitations of the review processes used. | 17 |
| 23d | Discuss implications of the results for practice, policy, and future research. | 16-17 |
| **OTHER INFORMATION** | | |  |
| Registration and protocol | 24a | Provide registration information for the review, including register name and registration number, or state that the review was not registered. | 4 |
| 24b | Indicate where the review protocol can be accessed, or state that a protocol was not prepared. | 4 |
| 24c | Describe and explain any amendments to information provided at registration or in the protocol. | NA |
| Support | 25 | Describe sources of financial or non-financial support for the review, and the role of the funders or sponsors in the review. | 18 |
| Competing interests | 26 | Declare any competing interests of review authors. | 18 |
| Availability of data, code and other materials | 27 | Report which of the following are publicly available and where they can be found: template data collection forms; data extracted from included studies; data used for all analyses; analytic code; any other materials used in the review. | NA |

## Supplementary Table S2: Search strategy

**EMBASE**

| **Search** | **Query** |
| --- | --- |
| #1 | 'acupuncture'/exp OR 'transcutaneous electrical nerve stimulation'/exp OR 'moxibustion'/exp OR 'cupping therapy'/exp OR 'catgut embedding'/exp OR 'acupuncture point'/exp OR 'electroacupuncture'/exp OR 'acupressure'/exp OR 'auricular acupuncture'/exp |
| #2 | 'acupuncture therapy':ab,ti OR 'acupuncture':ab,ti OR 'manual acupuncture':ab,ti OR 'body acupuncture':ab,ti OR 'acu-point':ab,ti OR 'acupoint':ab,ti OR 'acupoints':ab,ti OR 'acupuncture points':ab,ti OR 'point, acupuncture':ab,ti OR 'acupuncture, electric':ab,ti OR 'electric acupuncture':ab,ti OR 'electrical acupoint stimulation':ab,ti OR 'electrical acupuncture':ab,ti OR 'electro-acupuncture':ab,ti OR 'acupressure':ab,ti OR 'acupuncture, ear':ab,ti OR 'acupuncture, earlobe':ab,ti OR 'auriculo-acupuncture':ab,ti OR 'auriculotherapy':ab,ti OR 'acupoint catgut embedding therapy':ab,ti OR 'catgut implantation':ab,ti OR 'acupoint application':ab,ti OR 'electrostimulation, transcutaneous':ab,ti OR 'percutaneous electric nerve stimulation':ab,ti OR 'transcutaneous electrical stimulation':ab,ti OR 'tens':ab,ti OR 'moxibustion':ab,ti OR 'fire cupping':ab,ti OR 'cupping therapy':ab,ti |
| #3 | #1 OR #2 |
| #4 | 'chronic obstructive lung disease'/exp |
| #5 | 'copd':ab,ti OR 'chronic obstructive pulmonary disease':ab,ti OR 'chronic obstructive lung disease':ab,ti OR 'coad':ab,ti OR 'chronic obstructive airway disease':ab,ti OR 'chronic airflow obstruction':ab,ti |
| #6 | #4 OR #5 |
| #7 | 'systematic review'/exp OR 'meta analysis'/exp |
| #8 | 'systematic review':ab,ti OR 'meta analysis':ab,ti OR 'meta analyses':ab,ti OR 'meta-analysis':ab,ti OR 'meta-analyses':ab,ti OR 'metaanalysis':ab,ti OR 'metaanalyses':ab,ti |
| #9 | #7 OR #8 |
| #10 | #3 AND #6 AND #9 |

## Supplementary Table S3: Exclude systematic reviews

| **Author/Year** | **Title** | **Reason for exclusion** |
| --- | --- | --- |
| Suzuki1 2009 | Research into acupuncture for respiratory disease in Japan: a systematic review | In addition to COPD, there are other respiratory disorders |
| Huang2 2022 | acupuncture intervention in pulmonary rehabilitation based on lung function evaluation: Clinical research literature analysis | In addition to COPD, there are other respiratory disorders |
| Abdullah3 2016 | Evaluation of Wet Cupping Therapy: Systematic Review of Randomized Clinical Trials | The control group included acupuncture |
| Xiao4 2020 | Acupuncture in the treatment of stable chronic obstructive pulmonary disease: A systematic review of randomised controlled trials | The control group included traditional Chinese medicine |
| Wang5 2014 | Clinical literature study on acupuncture treatment of chronic obstructive pulmonary disease | The control group included acupuncture |
| Yuan6 2019 | Meta-analysis of efficacy of acupoint catgut embedding in stable COPD | The control group included traditional Chinese medicine |
| Wang7 2021 | Evaluation of curative effect of external treatment of traditional Chinese medicine on stable COPD based on literature research | Acupuncture therapy was not the main intervention |
| Zheng8 2019 | Meta-analysis and sequential analysis of acupoint injection of Chuankezhi injection for stable chronic obstructive pulmonary disease | Acupuncture therapy was not the main intervention |
| Li9 2012 | Effect of point application on chronic obstructive pulmonary disease in stationary phase and effects on pulmonary function: A systematic evaluation of randomized controlled trials | Acupuncture therapy was not the main intervention |
| Wang10 2014 | A meta-analysis of randomized controlled clinical studies on acupoint application in COPD remission | Acupuncture therapy was not the main intervention |
| Li11 2017 | Meta-analysis of clinical efficacy of traditional Chinese medicine characteristic therapy on stable chronic obstructive pulmonary disease | Acupuncture therapy was not the main intervention |
| Sheng12 2021 | A meta-analysis of heat-sensitive moxibustion in the treatment of chronic obstructive pulmonary disease | Acupuncture therapy was not the main intervention |
| Liu13 2021 | Rehabilitation Effects of Acupuncture on the Diaphragm Dysfunction in Chronic Obstructive Pulmonary Disease: A Systematic Review | Outcome indicators did not conform to the inclusion criteria |
| Wu14 2020 | Effect of acupoint application on T lymphocyte subsets in patients with chronic obstructive pulmonary disease: A meta-analysis. | Outcome indicators did not conform to the inclusion criteria |
| Wang15 2018 | Transcutaneous electric nerve stimulation over acupoints for chronic obstructive pulmonary disease: Protocol for a systematic review and meta-analysis | Not a Systematic review |
| Lin16 2022 | Meta-analysis of the treatment of chronic obstructive pulmonary disease by Sanfu paste | NOT randomized controlled trials |
| Wang17 2020 | Acupuncture Therapy for Functional Effects and Quality of Life in COPD Patients: A Systematic Review and Meta-Analysis | The control group included traditional Chinese medicine |
| Luo18 2022 | The curative effect of TCM external treatment on stable COPD patients: A Systematic Review and Bayesian Network Meta-Analysis | NOT randomized controlled trials |
| Su19 2023 | Efficacy of acupuncture therapy for stable chronic obstructive pulmonary disease A systematic review and meta-analysis | The control group included traditional Chinese medicine |

## Supplementary Table S4 Reporting quality assessment of systematic reviews by Preferred Reporting Items for Systematic Reviews and Meta-analyses for Acupuncture

| Section | Item | Lou 202120 | Wang 202021 | Xie  201922 | Cao 201723 | Yuan 202224 | Yu  202225 | Coyle 201426 | Carles 201927 | Hsieh 201928 | Gu  202329 | He  202230 | Cheng 201931 | Wu  201932 | Hu  201933 |
| --- | --- | --- | --- | --- | --- | --- | --- | --- | --- | --- | --- | --- | --- | --- | --- |
| Title | 1. Title | Y | Y | Y | Y | Y | Y | Y | Y | Y | Y | Y | Y | Y | Y |
| Abstract | 2. Structured summary | Y | Y | Y | Y | Y | Y | Y | Y | Y | Y | Y | Y | Y | Y |
| Introduction | 3. Rationale | Y | Y | Y | Y | PY | Y | Y | Y | Y | Y | Y | PY | Y | N |
| 4. Objectives | Y | Y | Y | Y | Y | Y | Y | Y | Y | Y | Y | Y | Y | Y |
| Methods | 5. Protocol and registration | N | N | N | N | N | N | N | Y | N | N | N | N | N | N |
| 6. Eligibility criteria | Y | Y | Y | Y | Y | Y | Y | Y | Y | Y | Y | Y | Y | Y |
| 7. Information sources | Y | Y | Y | Y | Y | Y | Y | Y | Y | Y | Y | Y | Y | Y |
| 8. Search | N | N | N | N | N | N | N | Y | N | N | N | N | N | Y |
| 9. Study selection | Y | Y | Y | Y | Y | Y | Y | Y | Y | Y | Y | PY | Y | Y |
| 10. Data collection process | Y | Y | Y | Y | Y | Y | Y | Y | Y | Y | Y | Y | Y | Y |
| 11. Data items | Y | N | Y | N | Y | Y | Y | Y | Y | N | N | N | Y | Y |
| 12. Risk of bias in individual studies | Y | Y | Y | Y | Y | Y | Y | Y | Y | Y | Y | Y | Y | Y |
| 13. Summary measures | Y | Y | Y | Y | Y | Y | Y | Y | Y | Y | Y | Y | Y | Y |
| 14. Synthesis of results | Y | Y | Y | Y | Y | Y | Y | Y | Y | Y | Y | Y | Y | Y |
| 15. Risk of bias across studies | Y | Y | Y | N | Y | N | Y | Y | N | Y | Y | Y | Y | N |
| 16. Additional analyses | Y | N | Y | Y | Y | Y | Y | Y | Y | Y | N | Y | N | Y |
| Results | 17. Study selection | Y | Y | Y | Y | Y | Y | Y | Y | Y | Y | PY | PY | Y | Y |
| 18. Study characteristics | PY | PY | Y | PY | PY | PY | PY | Y | Y | PY | N | PY | PY | PY |
| 19. Risk of bias within studies | Y | Y | Y | Y | Y | Y | Y | Y | Y | Y | Y | Y | Y | Y |
| 20. Results of individual studies | Y | Y | Y | Y | Y | Y | Y | Y | Y | Y | Y | Y | Y | Y |
| 21. Synthesis of results | Y | Y | Y | Y | Y | Y | Y | Y | Y | Y | Y | Y | Y | Y |
|  | 22. Risk of bias across studies | Y | Y | Y | N | Y | N | N | Y | Y | Y | Y | Y | Y | Y |
| 23. Additional analysis | Y | N | Y | N | N | Y | Y | Y | Y | N | N | Y | Y | Y |
| Discussion | 24. Summary of evidence | PY | PY | PY | PY | PY | PY | PY | Y | Y | PY | PY | PY | PY | PY |
| 25. Limitations | Y | Y | Y | Y | Y | Y | Y | Y | Y | Y | Y | N | Y | Y |
| 26. Conclusions | Y | Y | Y | Y | Y | Y | Y | Y | Y | Y | Y | Y | Y | Y |
| Funding | 27. Funding | N | N | N | N | N | N | N | Y | N | N | N | N | N | N |
|  | Of yes [n (%)] | 22 | 19 | 23 | 18 | 20 | 20 | 21 | 27 | 23 | 20 | 18 | 17 | 21 | 21 |
|  |  | (81.48) | (70.37) | (85.19) | (66.67) | (74.07) | (74.07) | (77.78) | (100.00) | (85.19) | (74.07) | (66.67) | (62.96) | (77.78) | (77.78) |

**Supplementary Table S4. Continued**

| Section | Item | Yu  201834 | Wei 202235 | Pang 202036 | Zhou 201437 | Huang 202138 | Carles 202039 | Wang 202340 | Yin 202341 | Of yes  [n (%)] |
| --- | --- | --- | --- | --- | --- | --- | --- | --- | --- | --- |
| Title | 1. Title | Y | Y | Y | Y | Y | Y | Y | Y | 22(100.00) |
| Abstract | 2. Structured summary | Y | Y | Y | Y | Y | Y | Y | Y | 22(100.00) |
| Introduction | 3. Rationale | Y | Y | Y | Y | Y | Y | N | N | 17(77.27) |
| 4. Objectives | Y | Y | Y | Y | Y | Y | Y | Y | 22(100.00) |
| Methods | 5. Protocol and registration | N | N | Y | Y | Y | Y | N | N | 5(22.73) |
| 6. Eligibility criteria | Y | Y | Y | Y | Y | Y | Y | Y | 22(100.00) |
| 7. Information sources | Y | Y | Y | Y | Y | Y | Y | Y | 22(100.00) |
| 8. Search | N | N | Y | Y | N | Y | N | N | 5(22.73) |
| 9. Study selection | Y | Y | Y | Y | Y | Y | Y | Y | 21(95.45) |
| 10. Data collection process | Y | Y | Y | Y | Y | Y | Y | Y | 22(100.00) |
| 11. Data items | Y | Y | Y | PY | Y | Y | PY | PY | 14(63.64) |
| 12. Risk of bias in individual studies | Y | Y | Y | Y | Y | Y | Y | Y | 22(100.00) |
| 13. Summary measures | Y | Y | Y | Y | Y | Y | Y | Y | 22(100.00) |
| 14. Synthesis of results | Y | Y | Y | Y | Y | Y | Y | Y | 22(100.00) |
| 15. Risk of bias across studies | N | Y | Y | N | N | N | Y | Y | 14(63.64) |
| 16. Additional analyses | N | Y | Y | N | Y | Y | Y | Y | 17(77.27) |
| Results | 17. Study selection | Y | Y | Y | Y | Y | Y | Y | Y | 20(90.91) |
| 18. Study characteristics | PY | PY | PY | Y | Y | Y | Y | Y | 8(36.36) |
| 19. Risk of bias within studies | Y | Y | Y | Y | Y | Y | Y | Y | 22(100.00) |
| 20. Results of individual studies | Y | Y | Y | Y | Y | Y | Y | Y | 22(100.00) |
| 21. Synthesis of results | Y | Y | Y | Y | Y | Y | Y | Y | 22(100.00) |
|  | 22. Risk of bias across studies | N | N | Y | N | Y | N | Y | Y | 15(68.18) |
| 23. Additional analysis | N | Y | Y | N | Y | N | Y | Y | 15(68.18) |
| Discussion | 24. Summary of evidence | PY | Y | Y | PY | Y | N | PY | PY | 5(22.73) |
| 25. Limitations | Y | Y | Y | Y | N | N | Y | Y | 19(86.36) |
| 26. Conclusions | Y | Y | Y | Y | Y | Y | Y | Y | 22(100.00) |
| Funding | 27. Funding | N | N | N | Y | Y | Y | N | N | 4(18.18) |
|  | Of yes [n (%)] | 18 | 22 | 25 | 21 | 24 | 22 | 21 | 21 |  |
|  |  | (66.67) | (81.48) | (92.59) | (77.78) | (88.89) | (81.48) | (77.78) | (77.78) |  |

**Abbreviations:** Y: yes; PY: partial yes; N: no.

## Supplementary Table S5 Evidence certainty assessments of outcomes of included systematic reviews by Grading of Recommendations Assessment, Development and Evaluation

| Outcome | Study | | Intervention | Trails(n) | Effect (95% CI) | Quality assessment |  |  |  |  | Quality of evidence |
| --- | --- | --- | --- | --- | --- | --- | --- | --- | --- | --- | --- |
|  |  | |  |  |  | Risk of bias | Inconsistency | Indirectness | Imprecision | Publication bias |  |
| Lung function |  | |  |  |  |  |  |  |  |  |  |
| FEV1 | Coyle26 2014 | | AT vs SA | 5 (298) | MD 0.03 (-0.05, 0.1) | 0 | 0 | 0 | -1③ | -1④ | Low |
|  |  | | AT vs CT | 2 (126) | MD 0.08 (-0.36, 0.52) | -1① | -1② | 0 | -1③ | 1④ | Very Low |
|  | He30 2022 | | (AC + CT) vs CT | 4 (442) | MD 0.13 (-0.08, 0.33) | 0 | -1② | 0 | -1③ | -1④ | Very Low |
|  | Yu34 2018 | | (AA+ CT) vs CT | 5 (452) | MD 0.15 (0.10, 0.21) | 0 | -1② | 0 | 0 | -1④ | Low |
|  | Wei35 2022 | | (TENS + CT) vs CT | 7 (298) | MD 0.13 (0.11, 0.16) | 0 | -1② | 0 | 0 | -1④ | Low |
|  | Pang36 2020 | | (AA+ CT) vs CT | 5 (545) | SMD 0.12 (0.04, 0.20) | 0 | 0 | 0 | 0 | 0 | High |
|  | Zhou37 2014 | | (AA+ Tx) vs CT | 3 (340) | MD 0.52 (0.42, 0.62) | 0 | 0 | 0 | 0 | -1④ | Moderate |
|  | Huang38 2021 | | (AT+ CT) vs CT | 5 (348) | SMD 0.32 (0.26, 0.39) | 0 | -1② | 0 | 0 | -1④ | Low |
|  | Gu29 2023 | | (AC + CT) vs CT | 8 (724) | MD 0.04 (0.00, 0.09) | 0 | 0 | 0 | 0 | 0 | High |  |
| FVC | Wang21 2020 | | (AT+ CT) vs CT | 4 (172) | MD 5.90 (3.07, 8.73) | 0 | 0 | 0 | -1③ | -1④ | Low |
|  | Coyle26 2014 | | AT vs SA | 4 (172) | MD -0.04 (-0.15, 0.08) | 0 | 0 | 0 | -1③ | -1④ | Low |
|  | Huang38 2021 | | (AU + CT) vs CT | 4 (326) | SMD 0.34 (0.11, 0.57) | 0 | -1② | 0 | 0 | -1④ | Low |
|  | Carles39 2020 | | TENS vs Sham TENS | 7 (288) | MD 0.12 (-0.16, 0.39) | -1① | 0 | 0 | 0 | -1④ | Low |
| FEV1% | Lou20 2021 | | (Mox + CT) vs CT | 13 (1188) | MD 4.00 (2.63, 5.37) | -1① | 0 | 0 | 0 | 0 | Moderate |
|  | Wang21 2020 | | (AT+ CT) vs CT | 6 (296) | MD 5.93 (5.76, 6.14) | 0 | 0 | 0 | 0 | -1④ | Moderate |
|  | Xie22 2019 | | (AT+ CT) vs CT | 6 (313） | MD 4.93 (1.75, 8.11) | 0 | -1② | 0 | -1③ | -1④ | Very Low |
|  | Cao23 2017 | | AT vs SA | 5 (219) | MD 4.93 (1.87, 7.99) | 0 | 0 | 0 | 0 | -1④ | Moderate |
|  | Yuan24 2022 | | (Mox + CT) vs CT | 5 (454) | MD 7.08 (3.24, 10.92) | -1① | -1② | 0 | 0 | -1④ | Very Low |
|  | Yu25 2022 | | (Mox + CT) vs CT | 7 (578) | MD 9.84 (2.47, 17.20) | -1① | -1② | 0 | -1③ | -1④ | Very Low |
|  | Coyle26 2014 | | AT vs SA | 2 (188) | MD -0.03 (-5.13, 5.07) | 0 | 0 | 0 | -1③ | -1④ | Low |
|  |  | | AT vs CT | 2 (126) | MD -0.03 (-5.13, 5.07) | -1① | -1② | 0 | -1③ | -1④ | Very Low |
|  | Carles27 2019 | | (AT+ CT) vs CT | 9 (462) * | MD 1.04 (-0.21, 2.29) | -1① | 0 | 0 | 0 | 0 | Moderate |
|  |  | | (AT+ CT) vs CT | 4 (267) ** | MD 3.09 (1.00, 5.18) | 0 | 0 | 0 | -1③ | -1④ | Low |
|  |  | | AT vs SA | 6 (227) | MD 5.40 (2.90, 7.91) | 0 | 0 | 0 | -1③ | -1④ | Low |
|  | Hsieh28 2019 | | (AT + CT) vs CT | 3 (200) | MD1.98 (0.26, 3.70) | -1① | 0 | 0 | -1③ | -1④ | Very Low |
|  |  | | AT vs CT | 4(261) | MD -0.33 (-3.45, 2.80) | -1① | -1② | 0 | -1③ | -1④ | Very Low |
|  | He30 2022 | | (AC + CT) vs CT | 3 (254) | MD 5.91 (-5.18, 16.99) | 0 | -1② | 0 | -1③ | -1④ | Very Low |
|  | Hu33 2019 | | (AA+ CT) vs CT | 3 (337) | MD 6.19 (3.27, 9.11) | 0 | 0 | 0 | -1③ | -1④ | Low |
|  | Yu34 2018 | | (AA + CT) vs CT | 6 (612) | MD 8.71 (7.77, 9.65) | 0 | -1② | 0 | -1③ | 0 | Low |
|  | Wei35 2022 | | (TENS + CT) vs CT | 3(154) | MD 5.92 (3.43, 8.41) | 0 | -1② | 0 | -1③ | -1④ | Very Low |
|  | Pang36 2020 | | (AA+ CT) vs CT | 6 (572) | MD 0.51 (-0.88, 1.90) | 0 | 0 | 0 | 0 | -1④ | Moderate |
|  | Wang40 2023 | | (AA + CT) vs CT | 11(974) | MD 3.04 (1.76, 4.33) | -1① | 0 | 0 | 0 | -1⑤ | Low |
|  | Gu29 2023 | | (AC + CT) vs CT | 5 (316) | MD 1.13 (0.38, 1.88) | 0 | 0 | 0 | -1③ | -1④ | Low |
| FEV1/FVC | Lou20 2021 | | (Mox + CT) vs CT | 10(809) | MD 3.56 (1.69, 5.43) | -1① | -1② | 0 | 0 | 0 | Low |
|  | Wang21 2020 | | (AT + CT) vs CT | 6 (438) | MD 10.16 (4.34, 15.99) | 0 | 0 | 0 | -1③ | -1④ | Low |
|  | Xie22 2019 | | (AT+ CT) vs CT | 10 (558） | MD 4.40 (0.72, 8.08) | 0 | -1② | 0 | -1③ | -1⑤ | Very Low |
|  | Cao23 2017 | | AT vs SA | 3 (91) | MD 7.57 (0.34, 14.80) | -1① | -1② | 0 | -1③ | -1④ | Very Low |
|  | Yuan24 2022 | | (Mox + CT) vs CT | 2 (108) | MD 9.36 (1.91, 16.80) | 0 | -1② | 0 | -1③ | -1④ | Very Low |
|  | Yu25 2022 | | (Mox + CT) vs CT | 4 (228) | MD 8.82 (3.14, 14.50) | -1① | -1② | 0 | -1③ | -1④ | Very Low |
|  | Carles27 2019 | | (AT+ CT) vs CT | 7 (349) * | MD 1.33 (-1.19, 3.85) | 0 | -1② | 0 | -1③ | 0 | Low |
|  |  | |  | 4 (330) ** | MD 3.42 (1.55, 5.29) | 0 | -1② | 0 | -1③ | 0 | Low |
|  |  | | AT vs SA | 4 (145) | MD 6.64 (3.44, 9.83) | 0 | 0 | 0 | -1③ | -1④ | Low |
|  | Hsieh28 2019 | | (AT+ CT) vs CT | 3 (200) | MD1.56 (-0.18, 3.29) | -1① | 0 | 0 | -1③ | -1④ | Very Low |
|  |  | | AT vs CT | 4(261) | MD 0.01 (-2.00, 2.03) | -1① | 0 | 0 | 0 | -1④ | Low |
|  | He30 2022 | | (AC + CT) vs CT | 5 (601) | MD 5.30 (0.35, 10.24) | 0 | -1② | 0 | -1③ | 0 | Low |
|  | Cheng31 2019 | | (AA + CT) vs CT | 10 (813) | MD 3.82 (1.42, 6.22) | 0 | -1② | 0 | -1③ | -1④ | Very Low |
|  | Hu33 2019 | | (AA + CT) vs CT | 4 (423) | MD 4.39 (1.56, 7.22) | 0 | -1② | 0 | -1③ | -1④ | Very Low |
|  | Yu34 2018 | | (AA+ CT) vs CT | 5 (537) | MD 3.07 (1.54, 4.60) | 0 | 0 | 0 | -1③ | 0 | Moderate |
|  | Pang36 2020 | | (AA+ CT) vs CT | 9(774) | SMD 0.11 (-0.03, 0.25) | 0 | 0 | 0 | -1③ | 0 | Moderate |
|  | Wang40 2023 | | (AA+ CT) vs CT | 7 (584) | MD 2.38 (0.84, 3.92) | -1① | 0 | 0 | 0 | 0 | Moderate |
|  | Yin41 2023 | | (AA+ CT) vs CT | 25 (2303) | MD 4.46 (3.17, 5.76) | 0 | 0 | 0 | 0 | -1⑤ | Moderate |
|  | Gu29 2023 | | (AC + CT) vs CT | 7 (742) | MD 3.75 (-0.56, 8.06) | 0 | -1② | 0 | -1③ | 0 | Low |
|  | Zhou37 2014 | | (AA+ CT) vs CT | 4 (422) | MD 7.76 (2.88, 12.63) | 0 | -1② | 0 | -1③ | 0 | Low |
| Exercise capacity |  | |  |  |  |  |  |  |  |  |  |
| 6MWD | Lou20 2021 | | (Mox + CT) vs CT | 3(240) | MD 35.00 (18.02, 51.99) | -1① | 0 | 0 | -1③ | -1④ | Very Low |
|  | Wang21 2020 | | (AT + CT) vs CT | 4(212) | MD 53.63 (31.45, 75.81) | 0 | 0 | 0 | -1③ | -1④ | Low |
|  | Cao23 2017 | | AT vs SA | 5 (203) | MD 33.69 (5.85, 61.52) | 0 | 0 | 0 | -1③ | -1④ | Low |
|  | Yuan24 2022 | | (Mox + Tx) vs CT | 3 (196) | MD 25.82 (5.59, 46.06) | 0 | 0 | 0 | -1③ | -1④ | Low |
|  | Yu25 2022 | | (Mox + CT) vs CT | 3 (200) | MD 26.80 (8.77, 44.87) | -1① | 0 | 0 | -1③ | -1④ | Very Low |
|  | Coyle26 2014 | | AT vs SA | 3 (208) | MD 28.14 (23.92, 32.36) | 0 | 0 | 0 | -1③ | -1④ | Low |
|  | Carles27 2019 | | (AT + CT) vs CT | 4 (306) * | MD 33.05 (19.11, 46.99) | 0 | -1② | 0 | -1③ | 0 | Low |
|  |  | |  | 2 (142) ** | MD 0.65 (-20.74, 22.04) | -1① | 0 | 0 | -1③ | -1④ | Very Low |
|  |  | | AT vs SA | 4 (158) | MD 76.68 (39.93, 113.43) | 0 | 0 | 0 | -1③ | -1④ | Low |
|  | Hsieh28 2019 | | (AT + CT) vs CT | 1 (80) | MD 8.40 (-5.88, 22.68) | 0 | -1② | 0 | -1③ | -1④ | Very Low |
|  | He30 2022 | | (AT+ CT) vs CT | 3 (388) | MD 27.20 (17.55, 36.84) | 0 | 0 | 0 | -1③ | 0 | Moderate |
|  | Wei35 2022 | | (TENS + CT) vs CT | 6 (312) | MD 14.68 (6.92, 22.44) | 0 | -1② | 0 | -1③ | -1④ | Very Low |
|  | Pang36 2020 | | (AA+ CT) vs CT# | 3 (306) | SMD 11.54 (-6.73, 29.81) | 0 | -1② | 0 | -1③ | -1④ | Very Low |
|  |  | | (AA+ CT) vs CT## | 3 (189) | MD 19.76 (15.09, 24.43) | 0 | 0 | 0 | -1③ | -1④ | Low |
|  | Zhou37 2014 | | (AA+ CT) vs CT | 3 (350) | MD 11.20 (0.83, 21.56) | 0 | 0 | 0 | -1③ | -1④ | Low |
|  | Huang38 2021 | | (AU+ CT) vs CT | 4 (249) | SMD 29.82 (19.31, 40.33) | 0 | -1② | 0 | -1③ | 0 | Low |
|  | Carles39 2020 | | TENS vs Sham TENS | 3 (128) | MD 6.59 (-2.00, 15.19) | -1① | 0 | 0 | -1③ | -1④ | Very Low |
|  | Gu29 2023 | | (AC + CT) vs CT | 4 (428) | MD 28.16 (17.31, 39.00) | 0 | -1② | 0 | -1③ | -1④ | Very Low |
| Quality of life |  | |  |  |  |  |  |  |  |  |  |
| SGRQ | Wang21 2020 | | (AT+ CT) vs CT | 2(130) | MD -2.76 (-5.65, 0.14) | 0 | 0 | 0 | -1③ | -1④ | Low |
|  | Cao23 2017 | | AT vs SA | 2 (98) | MD -9.00 (-14.44, -3.56) | 0 | 0 | 0 | -1③ | -1④ | Low |
|  | Coyle26 2014 | | AT vs SA | 3 (208) | MD -8.33 (-13.13, -3.53) | 0 | 0 | 0 | -1③ | -1④ | Low |
|  | Hsieh28 2019 | | (AT + CT) vs CT | 1 (40) | MD 0.30 (-6.83, 7.43) | -1① | -1② | 0 | -1③ | -1④ | Very Low |
|  | Cheng31 2019 | | (AA+ CT) vs CT | 4 (255) | MD -3.99 (-6.84, -1.14) | 0 | 0 | 0 | -1③ | -1④ | Low |
|  | Wu32 2019 | | (AA + CT) vs CT | 4 (330) | MD -8.48 (-15.89, -1.07) | 0 | -1② | 0 | -1③ | -1④ | Very Low |
|  | Hu33 2019 | | (AA + CT) vs CT | 2 (225) | MD -5.55 (-7.93, -3.17) | 0 | 0 | 0 | -1③ | -1④ | Low |
|  | Yu34 2018 | | (AA+ CT) vs CT | 6 (605) | MD -5.27 (-6.68, -3.86) | 0 | -1② | 0 | -1③ | 0 | Low |
|  | Pang36 2020 | | (AA + CT) vs CT# | 6 (607) | MD -2.73 (-4.14, -1.33) | 0 | 0 | 0 | 0 | 0 | High |
|  |  | | (AA + CT) vs CT## | 2 (251) | MD -8.40 (-13.09, -3.71) | 0 | 0 | 0 | -1③ | -1④ | Low |
|  |  | | (AA + CT) vs CT### | 3 (175) | MD -2.62 (-4.88, -0.36) | 0 | 0 | 0 | -1③ | -1④ | Low |
|  | Wang40 2023 | | (AA + CT) vs CT | 2 (253) | MD -7.36 (-13.22, -1.51) | -1① | -1② | 0 | 0 | -1④ | Very Low |
|  | Yin41 2023 | | (AA + CT) vs CT | 9 (799) | MD -6.77 (-9.81, -3.72) | 0 | -1② | 0 | -1③ | 0 | Low |
| CAT | Xie22 2019 | | (AT+ CT) vs CT | 2 (58) | MD -4.25 (-5.70, -2.80) | 0 | 0 | 0 | -1③ | -1④ | Low |
|  | Yuan24 2022 | | (Mox + CT) vs CT | 5 (453) | MD -3.40 (-5.82, -0.98) | -1① | -1② | 0 | 0 | -1④ | Very Low |
|  | Hsieh28 2019 | | (AT+ CT) vs CT | 2 (120) | MD -4.77 (-6.53, -3.01) | 0 | 0 | 0 | -1③ | 0 | Moderate |
|  | He30 2022 | | (AC+ CT) vs CT | 7 (598) | MD -2.12 (-3.50, -0.73) | 0 | -1② | 0 | 0 | 0 | Moderate |
|  | Hu33 2019 | | (AA+ CT) vs CT | 2 (124) | MD -3.26 (-4.35, -2.16) | 0 | 0 | 0 | 0 | -1④ | Moderate |
|  | Wei35 2022 | | (TENS + CT) vs CT | 2 (99) | MD 0.13 (0.11, 0.16) | 0 | -1② | 0 | 0 | -1④ | Low |
|  | Huang38 2021 | | (AU+ CT) vs CT | 4 (303) | SMD 3.22(2.72, 3.73) | 0 | -1② | 0 | 0 | -1④ | Low |
|  | Wang40 2023 | | (AA + CT) vs CT | 3 (273) * | MD -1.92 (-2.73, -1.10) | -1① | 0 | 0 | -1③ | -1④ | Very Low |
|  |  | |  | 2 (177) ** | MD -4.57 (-7.42, -1.72) | -1① | 0 | 0 | -1③ | -1④ | Very Low |
|  | Yin41 2023 | | (AA + CT) vs CT | 7 (529) | MD -3.33 (-3.87, -2.79) | 0 | 0 | 0 | 0 | -1④ | Moderate |
|  | Gu29 2023 | | (AC + CT) vs CT | 9 (707) | MD -2.39 (-3.65, -1.13) | 0 | -1② | 0 | -1③ | 0 | Low |
| Dyspnea |  | |  |  |  |  |  |  |  |  |  |
| mMRC | Lou20 2021 | | (Mox + CT) vs CT | 3(240) | MD -4.25 (-5.24, -3.27) | -1① | -1② | 0 | 0 | -1④ | Very Low |
|  | Xie22 2019 | | (AT+ CT) vs CT | 3 (118) | MD -0.63 (-0.86, -0.39) | 0 | 0 | 0 | -1③ | -1④ | Low |
|  | Yuan24 2022 | | (Mox + CT) vs CT | 3 (196) | MD -0.57 (-1.18, -0.05) | -1① | -1② | 0 | 0 | -1④ | Very Low |
|  | Yu25 2022 | | (Mox + CT) vs CT | 5 (320) | MD -0.52 (-0.88, -0.15) | -1① | -1② | 0 | 0 | -1④ | Very Low |
|  | Coyle26 2014 | | AT vs SA | 2 (188) | MD -0.34 (-0.38, -0.30) | 0 | 0 | 0 | -1③ | -1④ | Low |
|  | Carles27 2019 | | (AT+ CT) vs CT | 2 (121) * | MD 0.07 (-0.48, 0.62) | 0 | -1② | 0 | -1③ | 1④ | Very Low |
|  |  | |  | 1 (62) ** | MD 0.22 (-0.02,0.46) | 0 | 0 | 0 | -1③ | 1④ | Low |
|  |  | | AT vs SA | 2 (103) | MD -0.77 (-1.14, -0.41) | 0 | 0 | 0 | -1③ | 1④ | Low |
|  | Wei35 2022 | | (TENS + CT) vs CT | 2 (90) | MD -0.46 (-0.86, -0.06) | 0 | -1② | 0 | 0 | 1④ | Low |
|  | Pang36 2020 | | (AA + CT) vs CT | 3 (236) | SMD -1.14 (-1.53, - 0.75) | -1① | 0 | 0 | 0 | 1④ | Low |
|  | Gu29 2023 | | (AC + CT) vs CT | 2 (147) | MD -0.15(-0.29, -0.02) | 0 | 0 | 0 | -1③ | -1④ | Low |
| Borg scale | Coyle26 2014 | | AT vs SA | 1 (62) | MD -2.70 (-3.81, -1.59) | 0 | 0 | 0 | 0 | 1④ | Moderate |
|  | Carles27 2019 | | (AT+ CT) vs CT | 2 (121) | MD -0.38 (-0.80, -0.04) | 0 | 0 | 0 | -1③ | 0 | Moderate |
|  | Wei35 2022 | | (AC + CT) vs CT | 2 (90) | MD -0.46 (-0.86, -0.06) | 0 | -1② | 0 | 0 | 1④ | Low |  |
| Acute exacerbation | Lou20 2021 | | (Mox + CT) vs CT | 2 (125) | MD -0.31 (-0.49, -0.13) | -1① | 0 | 0 | -1③ | -1④ | Very Low |
|  | Yuan24 2022 | | (Mox + CT) vs CT | 2 (128) | MD -0.31 (-0.49, -0.14) | 0 | 0 | 0 | 0 | -1④ | Moderate |
|  | Yu34 2022 | | (Mox + CT) vs CT | 2 (108) | MD -0.31 (-0.52, -0.11) | -1① | 0 | 0 | 0 | -1④ | Low |
|  | He30 2022 | | (AC + CT) vs CT | 5 (481) | MD -0.54 (-0.91, -0.17) | 0 | -1② | 0 | -1③ | 0 | Low |
|  | Wu32 2019 | | (AA+ CT) vs CT | 6 (626) | MD -0.66 (-0.76, -0.57) | 0 | 0 | 0 | 0 | -1④ | Moderate |
|  | Yu34 2018 | (AA + CT) vs CT | | 4 (432) | MD -1.38 (-1.56, -1.20) | 0 | -1② | 0 | 0 | -1④ | Low |
|  | Zhou37 2014 | (AA+ CT) vs SA + CT | | 2 (211) | MD 0.19 (-0.03, 0.40) | -1① | 0 | 0 | -1③ | -1④ | Very Low |
|  |  | (AA+ CT) vs CT | | 2 (185) | MD -0.50 (-0.66, -0.33) | 0 | 0 | 0 | 0 | -1④ | Moderate |
|  | Wang40 2023 | (AA+ CT) vs CT | | 6 (614) | MD -1.85(-2.67, -1.03) | -1① | -1② | 0 | 0 | 0 | Low |

**Abbreviations:**① The design of the experiment with a large bias in random, distributive hiding, or blind; ② The size and direction of the effect size and the overlap of the confidence interval are small, the P-value of the heterogeneity test is small, and the combined result of *I2* value is large; ③ The optimal information size is not enough; ④ Few studies are included and there may be a large publication bias; ⑤ funnel graph asymmetry.

*: stable COPD; **: acute exacerbation of COPD; #: first session; ##:second session; ### : third session; FEV1: forced expiratory volume in the first second; FVC: forced vital capacity; FEV1%: the percentage of forced expiratory volume in the first second to the expected value; FEV1/FVC: the ratio of forced expiratory volume to forced vital capacity in the first second; 6MWD: six-minute walking distance; SGRQ: St. George’s Respiratory Questionnaire; CAT: COPD assessment test; mMRC: modified Medical Research Council scale; AT: acupuncture; CT: Conventional treatment; AA: acupoint application; TENS: Transcutaneous electrical nerve stimulation; Mox: Moxibustion; SA: sham acupuncture; AU: Acupoint autohemotherapy.


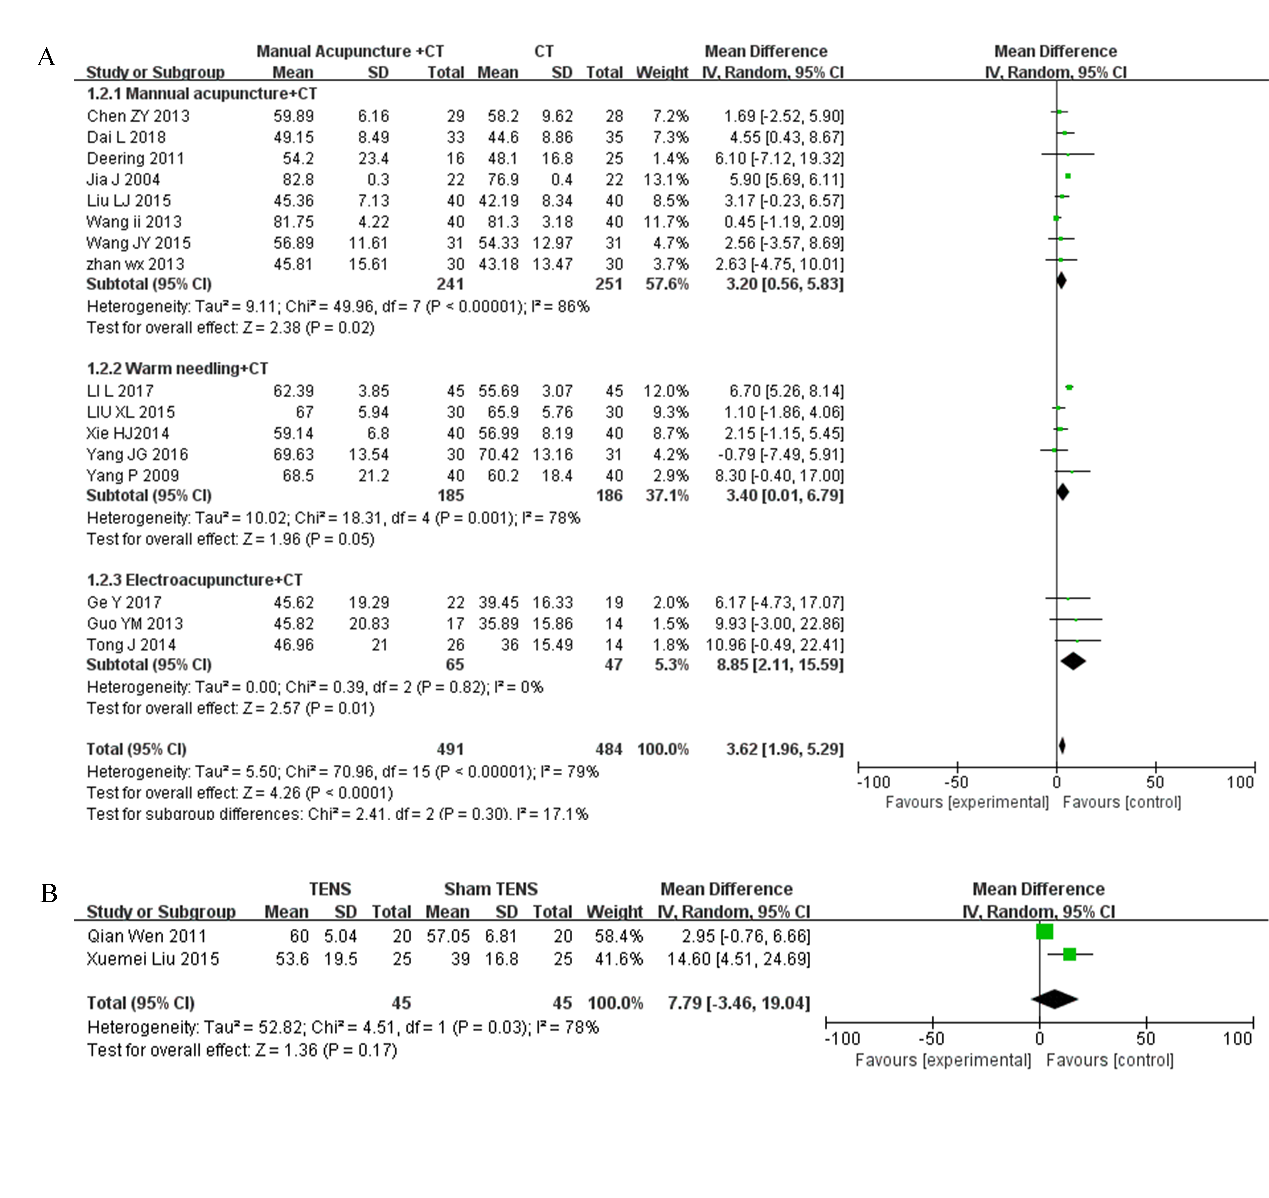


**Abbriviations:** CT: Conventional treatment;TENS: Transcutaneous electrical nerve stimulation.

## Supplementary Figure S1 Forest plots of FEV1%


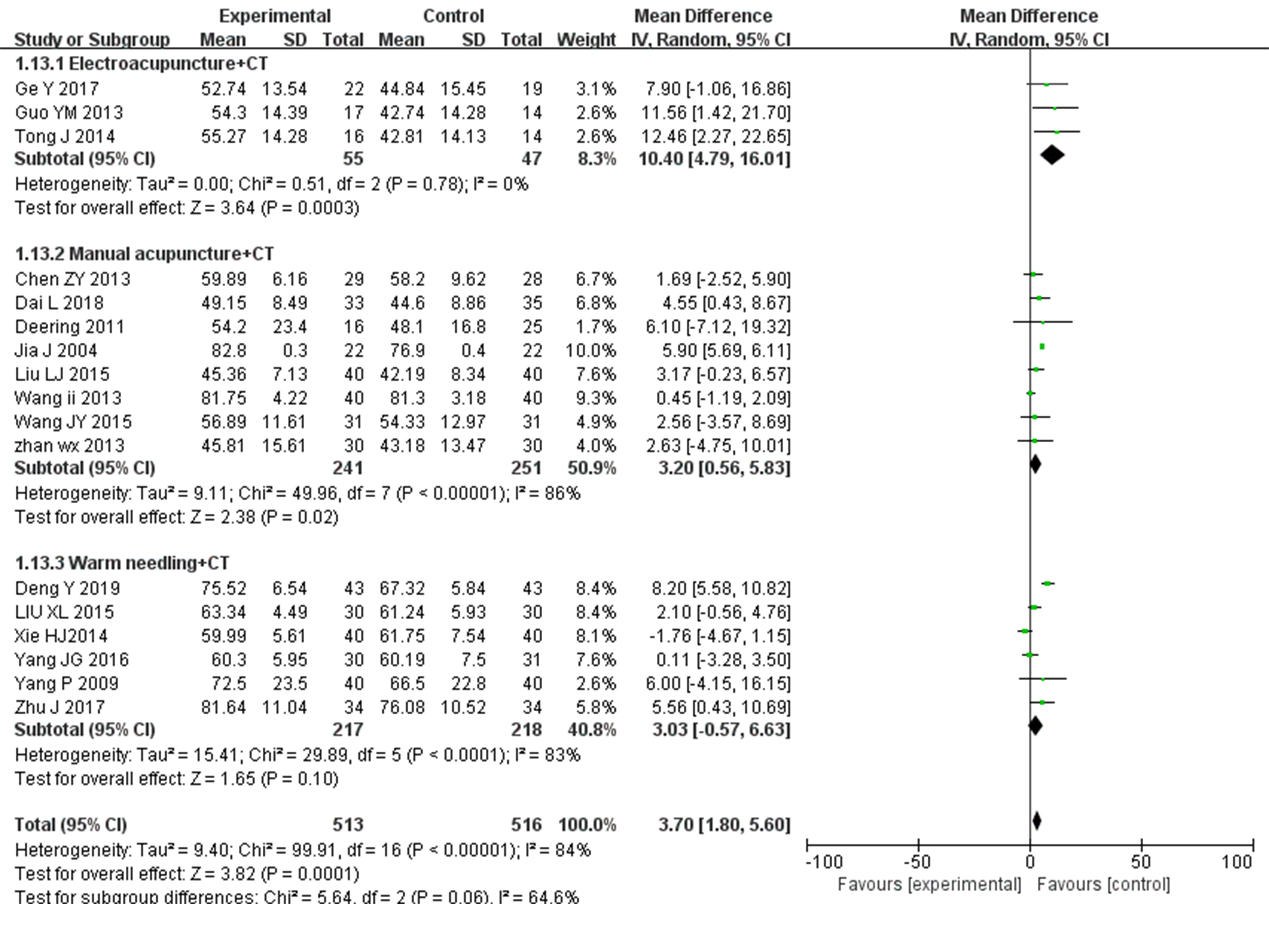
 **Abbriviations:** CT: Conventional treatment.

## Supplementary Figure S2 Forest plots of FEV1/FVC


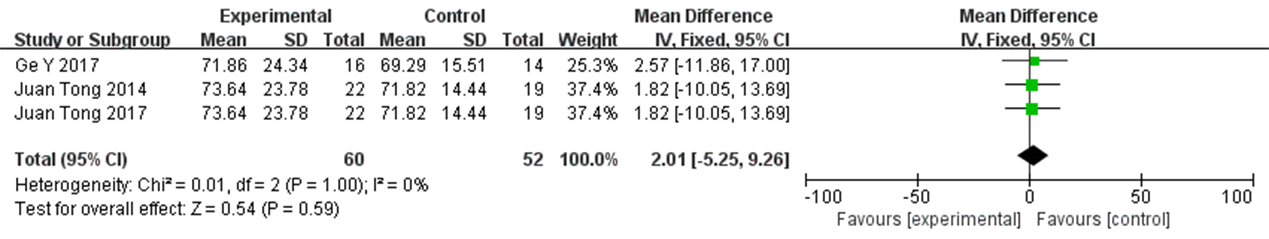


**Abbriviations:** Electroacupuncture + Conventional treatment vs Sham electroacupuncture + Conventional treatment

## Supplementary Figure S3 Forest plots of FVC


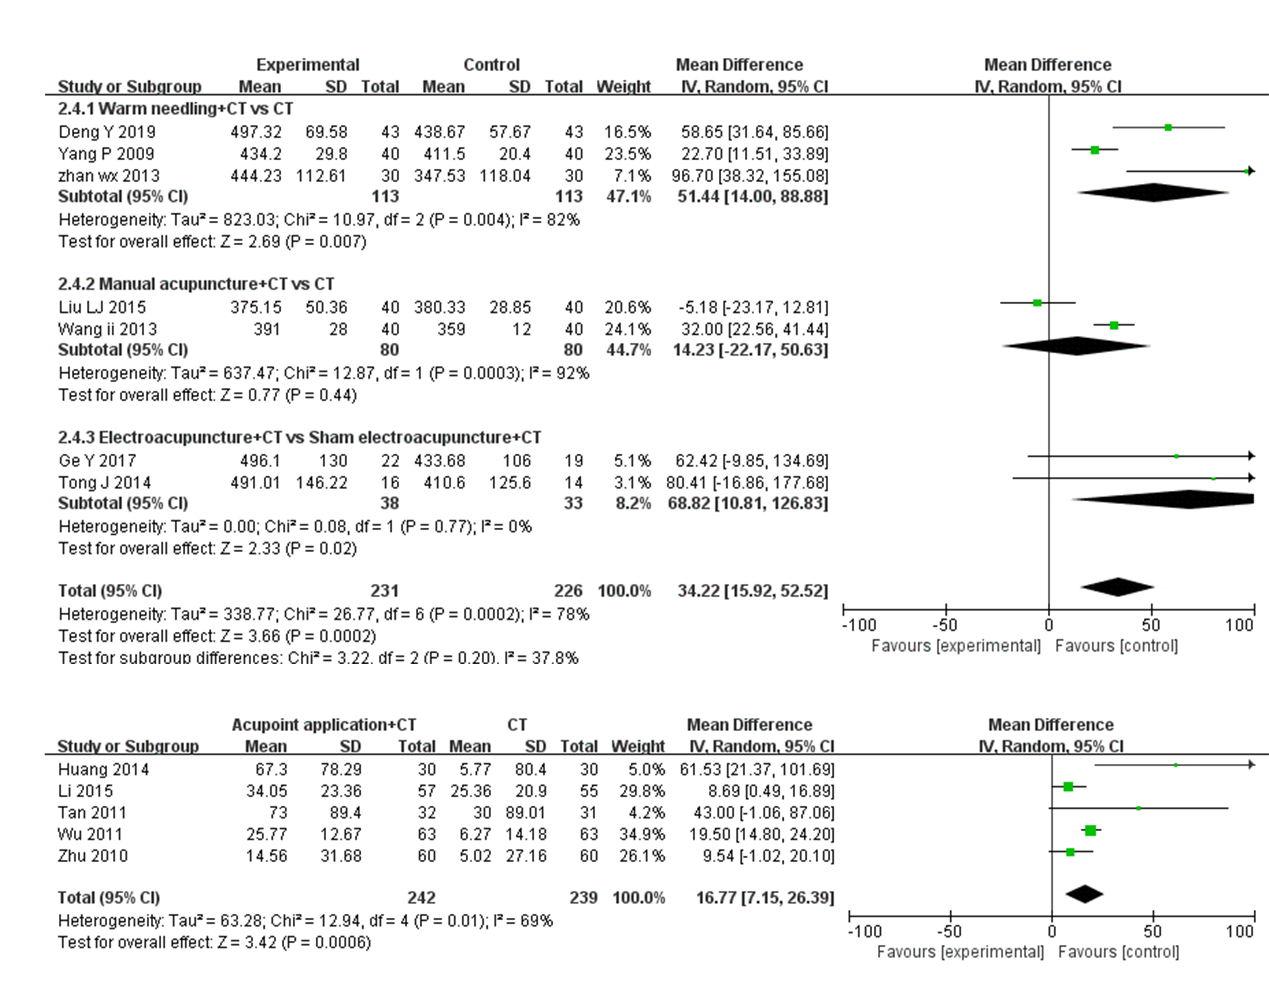


**Abbriviations:** CT: Conventional treatment.

## Supplementary Figure S4 Forest plots of 6MWD

**References**

1. Suzuki M, Yokoyama Y, Yamazaki H. Research into acupuncture for respiratory disease in Japan: a systematic review. Acupunct Med. 2009;27(2):54-60. doi:10.1136/aim.2009.000471
2. Huang ZY, Tong HC, Hu X, Xia ZH, Xu DB, Zhao B, et al. acupuncture intervention in pulmonary rehabilitation based on lung function evaluation: Clinical research literature analysis (in Chinese). Tradit Chin Med Rehab. 2022;13(06):78-80. doi:10.19787/j.issn.1008-1879.2022.06.026
3. Al Bedah AM, Khalil MK, Posadzki P, Sohaibani I, Aboushanab TS, AlQaed M, et al. Evaluation of Wet Cupping Therapy: Systematic Review of Randomized Clinical Trials. J Altern Complement Med. 2016;22(10):768-777. doi:10.1089/acm.2016.0193
4. Xiao X, Li S, Cao Z, Wang Y. Acupuncture in the treatment of stable chronic obstructive pulmonary disease: A systematic review of randomised controlled trials. J King Saud Univ SCI. 2020;32(8):3237-3248. doi:10.1016/j.jksus.2020.04.001
5. Wang Q. Clinical literature study on acupuncture treatment of chronic obstructive pulmonary disease. [Master’s thesis]. Guangzhou (China): Jinan University; 2014.
6. Yuan Y. Meta-analysis of efficacy of acupoint catgut embedding in stable COPD (in Chinese). Chin J of Urb and Rur Ent Hygiene. 2019;34(05):22-27. doi:10.16286/j.1003-5052.2019.05.009
7. Wang JR. Evaluation of curative effect of external treatment of traditional Chinese medicine on stable COPD based on literature research. [Master’s thesis]. Liaoning (China): Liaoning University of Chinese Medicine; 2021.
8. Zheng WJ, Peng ZJ, Zhang TG, Hong HD, Huang AS, Hong Y, et al. Meta-analysis and sequential analysis of acupoint injection of Chuankezhi injection for stable chronic obstructive pulmonary disease (in Chinese). Tradit Chin Drug Res and Clin Pharmacol. 2019;30(06):725-732. doi:10.19378/j.issn.1003-9783.2019.06.015
9. Li F, Gao Z, Jing J, Xu D, Upur H. Effect of point application on chronic obstructive pulmonary disease in stationary phase and effects on pulmonary function: a systematic evaluation of randomized controlled trials. J Tradit Chin Med. 2012;32(4):502-14. doi: 10.1016/s0254-6272(13)60062-x
10. Wang Q, Zhao CH. A meta-analysis of randomized controlled clinical studies on acupoint application in COPD remission (in Chinese). 2014;34(03):44-48. doi:10.13424/j.cnki.mtcm.2014.03.014
11. Li N. Meta-analysis of clinical efficacy of traditional Chinese medicine characteristic therapy on stable chronic obstructive pulmonary disease. [Master’s thesis]. Zhengzhou (China): Henan University of Chinese Medicine; 2018.
12. Sheng HB, Zhu MM. A meta-analysis of heat-sensitive moxibustion in the treatment of chronic obstructive pulmonary disease. (in Chinese). Shanghai Med & Pharma J. 2021;42(06):35-38+59. doi:1006-1533（2021）06-0035-04
13. Liu Q, Duan H, Lian A, Zhuang M, Zhao X, Liu X. Rehabilitation effects of acupuncture on the diaphragm dysfunction in chronic obstructive pulmonary disease: A systematic review. Int J Chron Obstruct Pulmon Dis. 2021;16:2023-2037. doi:10.2147/COPD.S313439
14. Wu JJ, Zhang YX, Xu HR, Li YX, Jiang LD, Wang CX, et al. Effect of acupoint application on T lymphocyte subsets in patients with chronic obstructive pulmonary disease: A meta-analysis. Medicine (Baltimore). 2020;99(16):e19537. doi: 10.1097/MD.0000000000019537.
15. Wang JJ, Xie Y, Zhao HL, Han WH, Wang XC. Transcutaneous electric nerve stimulation over acupoints for chronic obstructive pulmonary disease: Protocol for a systematic review and meta-analysis. Medicine (Baltimore). 2018;97(25):e11199. doi:10.1097/MD.0000000000011199
16. Lin FX, Zheng JH, Zhong MR, Guo LS, Sun ZQ, Yi JB. Meta-analysis of the treatment of chronic obstructive pulmonary disease by Sanfu paste (in Chinese). Guangxi J of Tradit Chin Med. 2016;39(04):76-80. doi:1003-0719(2016)04-0076-05
17. Wang J, Li J, Yu X, Xie Y. Acupuncture Therapy for Functional Effects and Quality of Life in COPD Patients: A Systematic Review and Meta-Analysis. Biomed Res Int. 2018;2018:3026726. doi:10.1155/2018/3026726
18. The curative effect of TCM external treatment on stable COPD patients: A Systematic Review and Bayesian Network Meta-Analysis (in Chinese). J of Nurses Train. 2022;37(02):151-158. doi:10.16821/j.cnki.hsjx.2022.02.011
19. Fan S, Zhang Z, Wang Q. Efficacy of acupuncture therapy for stable chronic obstructive pulmonary disease: A systematic review and meta-analysis. Medicine (Baltimore). 2023;102(15):e33537. doi:10.1097/MD.0000000000033537
20. Lou JL, Sun HJ, Li XY, et al. Clinical efficacy and safety of moxibustion as adjuvant therapy for COPD in stable phase: a Meta-analysis (in Chinese). Zhongguo Zhen Jiu. 2021;41(4):451-7. doi:10.13703/j.0255-2930.20200213-k0004
21. Wang YD, Li FS, Li Z, Yue JN, Ma CL. Systematic Evaluation of Acupuncture and Moxibustion on Pulmonary Rehabilitation in Patients with S-table Chronic Obstructive Pulmonary Disease (in Chinese). Mod Trad Chin Med Mater Medica World Sci Technol. 2020;22(01):196-204. doi:10.11842/wst.20190222003
22. Xie HF. Systematic review and meta-analysis of acupuncture treatment for acute exacerbation of COPD. [Master’s thesis]. Beijing (China): Beijing University of Chinese Medicine; 2019.
23. Cao AL, He HL, Zhou XM. Meta analysis of the therapeutic effect of acupuncture on chronic obstructive pulmonary disease (in Chinese). Global Tradit Chin Med. 2017;10(07):899-904. doi:10.3969 /j.issn.1674-1749.2017. 07. 038
24. Yuan Y. Meta-analysis of Governor Moxibustion to Improve clinical efficacy and quality of life of chronic obstructive pulmonary disease (in Chinese). J of Med Informa. 2022;35(01):93-9. doi:10.3969/j.issn.1006-1959.2022.01.022
25. Yu MX, Huang HR, Huang YX, Yu ZL, Wu CJ. Effect of Du moxibustion on rehabilitation in patients with chronic obstructive pulmonary disease in Stable Stage: A Meta-analysis (in Chinese). Fujian J of Tradit Chin Med. 2022;53(09):54-9. doi:10.13260/j.cnki.jfjtcm.012553
26. Coyle ME, Shergis JL, Huang ET, et al. Acupuncture therapies for chronic obstructive pulmonary disease: a systematic review of randomized, controlled trials. Altern Ther Health Med. 2014;20(6):10-23.
27. Fernández-Jané C, Vilaró J, Fei Y, et al. Filiform needle acupuncture for copd: A systematic review and meta-analysis. Complement Ther Med. 2019;47:102182. doi:10.1016/j.ctim.2019.08.016
28. Hsieh PC, Yang MC, Wu YK, Chen HY, Tzeng IS, Hsu PS, et al. Acupuncture therapy improves health-related quality of life in patients with chronic obstructive pulmonary disease: A systematic review and meta-analysis. Complement Ther Clin Pract. 2019;35:208-18. doi:10.1016/j.ctcp.2019.02.016
29. Gu C, Yu Y, Chen Y, et al. Effect of acupoint catgut embedding combined with western medicine on patients with stable COPD: Acupoint catgut embedding treating stable COPD meta-analysis. Medicine (Baltimore). 2023;102(41):e35281. doi:10.1097/MD.0000000000035281
30. He WQ, Li JS, Wang MH. Literature Analysis of Acupoint Catgut Embedding Therapy for Chronic Obstructive Pulmonary Disease (in Chinese). J of Basic Chine Med. 2022;28(07):1140-6. doi:10.19945/j.cnki.issn.1006-3250.2022.07.018
31. Cheng JP, Niu GH, Chen JW, Shen XK, Wu YT. Meta-analysis of the Acupoint Application Therapy of “Treating Winter Diseases in Summer” for Chronic Obstructive Pulmonary Disease: an Updated Systematic Review (in Chinese). Clin J of Tradition Chin Med. 2019;31(12):2270-6. doi:10.16448/j.cjtcm.2019.0657
32. Wu D, Yang C, Tong JB, Zhang XX, Yang QJ, Li ZG. Meta Analysis Of Acupoint Application In The Prevention And Treatment Of Chronic Obstructive Pulmonary Disease (in Chinese). Mod Trad Chin Med Mater Medica World Sci Technol. 2019;21(11):2491-8. doi:10.16448/j.cjtcm.2019.0657
33. Hu HY, Sun MY, Zhu ZY, Xuan LH, Yu BY. Systematic Assessment and Meta-analysis of Acupoint Application for Stable Chronic Obstructive Pulmonary (in Chinese). Shanghai J of Acu and Mox. 2019;38(08):932-40. doi:10.13460/j.issn.1005-0957.2019.08.0932
34. Yu JJ, Wang J, Cai CS. A Meta-analysis of point application on pulmonary rehabilitation in patients with stable chronic obstructive pulmonary disease (in Chinese). Clin J of Chin Med. 2018;10(25):1-5. doi:10.3969/j.issn.1674-7860.2018.25.001
35. Wei Y, Yuan N, Dong Y, Wang L, Ding J. Transcutaneous electrical nerve stimulation over acupoint for chronic obstructive pulmonary disease: A systematic review and meta-analysis. Front Public Health. 2022;10:937835. doi:10.3389/fpubh.2022.937835
36. Pang LJ, Zhang H, Lu XD, Liu JP, Liu C, Lu L. Preventive and therapeutic effectiveness of Sanfu acupoint herbal patching for chronic obstructive pulmonary disease at stable stages: a systematic review and Meta-analysis (in Chinese). J of Trad Chin Med. 2020;40(04):530-49. doi:10.19852/j.cnki.jtcm.2020.04.003
37. Zhou F, Shan YW, Lewith G, Liu JP. Acupoint Herbal Patching with or without Conventional Treatment for Stable Chronic Obstructive Pulmonary Disease: Systematic Review of Randomized Controlled Trials (in Chinese). World J of Trad Chin Med. 2015;1(01):45-58. doi:10.15806/j.issn.2311-8571.2014.0013
38. Huang C, Chen C, Zhou R, et al. A systematic review and meta-analysis of acupoint autohemotherapy and western medicine therapy in treating chronic obstructive pulmonary disease. Complement Ther Clin Pract. 2021;43:101336. doi:10.1016/j.ctcp.2021.101336
39. Fernández-Jané C, Vilaró J, Fei Y, et al. Acupuncture techniques for COPD: a systematic review. BMC Complement Med Ther. 2020;20(1):138. doi:10.1186/s12906-020-02899-3
40. Wang LM, Tang L, Shi MJ, et al. Meta-analysis and Grade evaluation of acupoint application in treatment of chronic obstructive pulmonary disease (in Chinese). Tianjin Chin Med. 2023;40(10):1292-1303. doi: 10.11656/j.issn.1672-1519.2023.10.13
41. Yin YQ, Zeng JR, Shen F. Meta-analysis of the acupoint application therapy for stable chronic obstructive pulmonary disease (in Chinese). J of Hainan Med Univ. 2023;(21):1655-1663. doi: 10.13210/j.cnki.jhmu.20230515.001
